# Supplementary material
Source: MDPI journal article supplement (https://www.mdpi.com/2073-4352/14/5/402)
Supplement: s1 [file s1]

## Supplementary Data

### Recognition of a Single $\beta$ -D-Xylopyranose Molecule by Xylanase GH11 from *Thermoanaerobacterium* *saccharolyticum*

Ki Hyun Nam

College of General Education, Kookmin University, Seoul 02707, Republic of Korea;  
structure@kookmin.ac.kr

**A****Data I**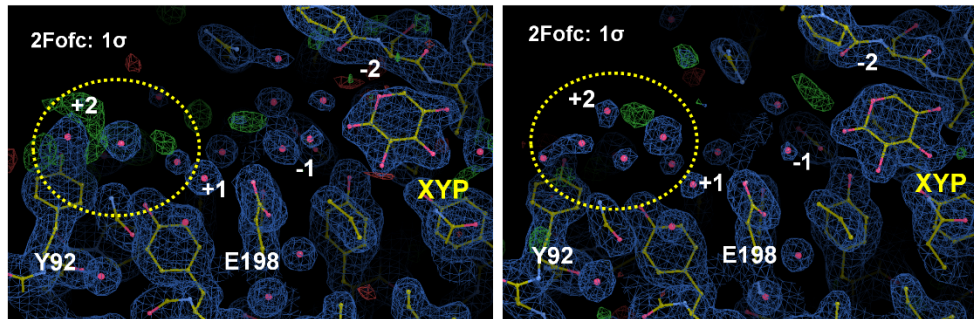

Open Conformation

Closed conformation

**B****Data II**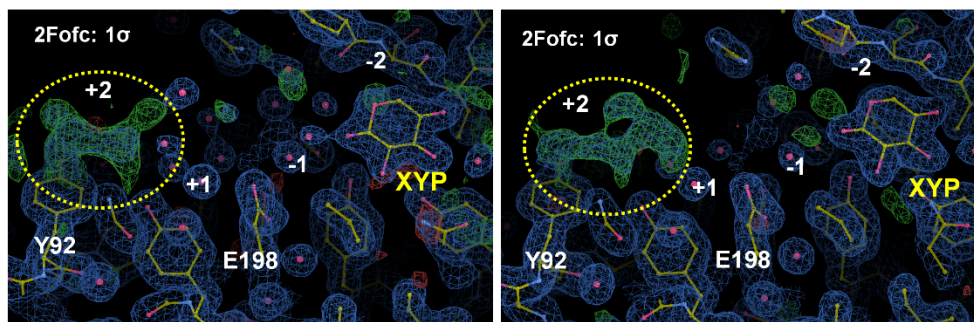

Open Conformation

Closed conformation

**C****Data II**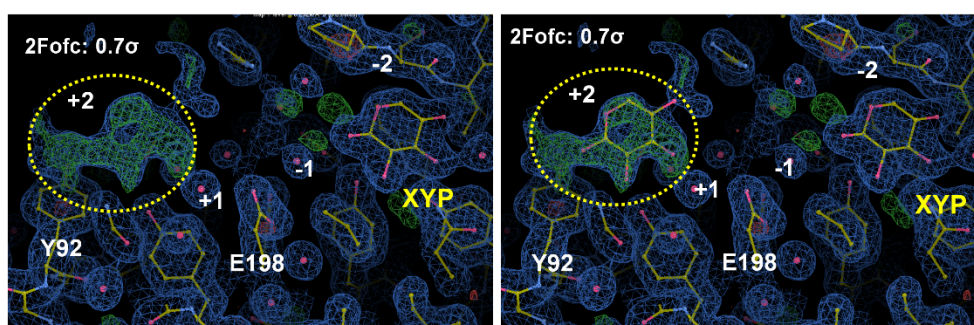

Closed conformation

Closed conformation

**Figure S1.** 2Fo-Fc electron-density maps (blue mesh) and Fo-Fc electron-density maps (+3  $\sigma$ : green mesh; -3  $\sigma$ : red mesh) of the TsGH11-XYP molecule from (A) Data I and (B) Data II. (C) Modeling of the XYP molecule in a 2Fo-Fc electron-density map (0.7  $\sigma$ , blue mesh) at the +2 subsite of the TsGH11 closed conformation.

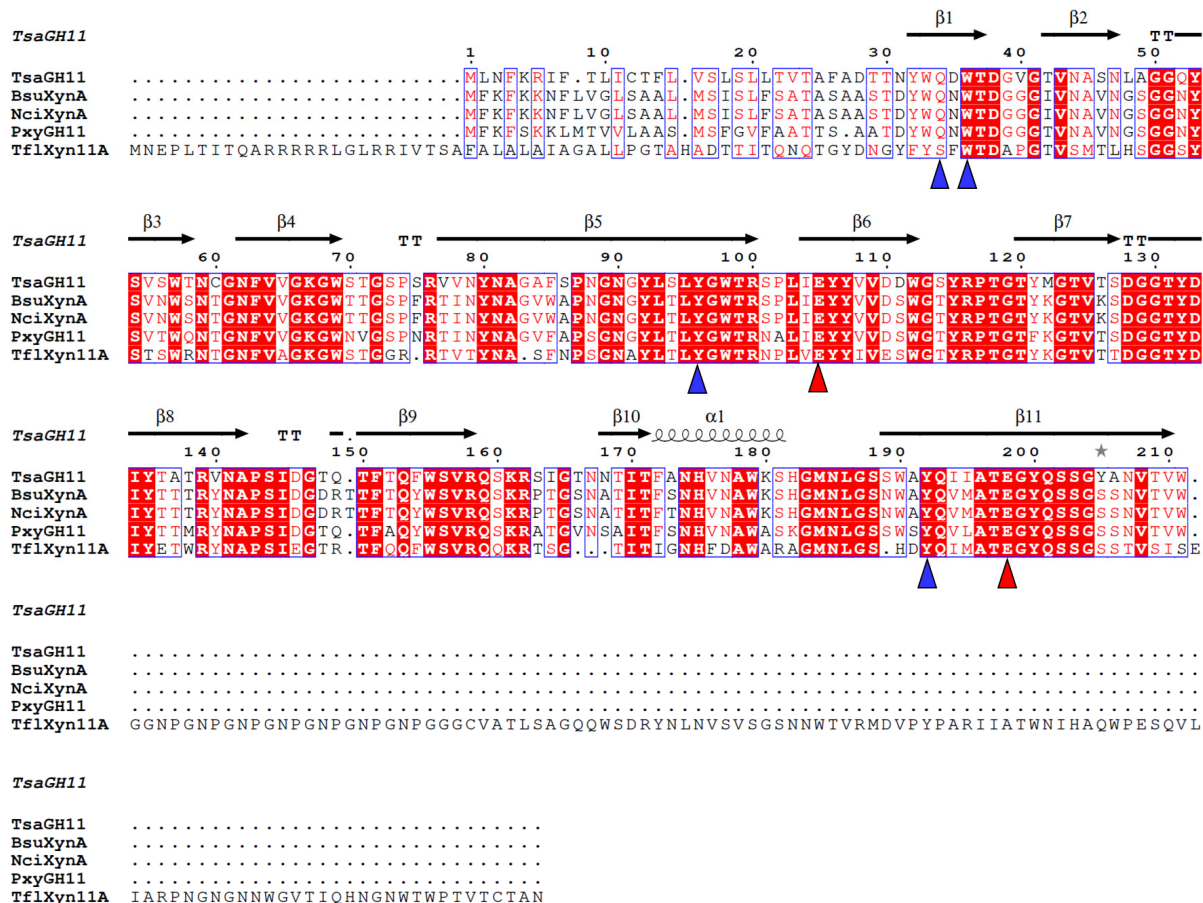

**Figure S2.** Structure-based multiple sequence alignment of .TsaGH11 (UniProt: I3VTR8) compared with BsXynA (P18429), NciXynA (P09850), PxyGH11 (A0A0M9BNX9), and TflXyn11A (Q8GMV7).

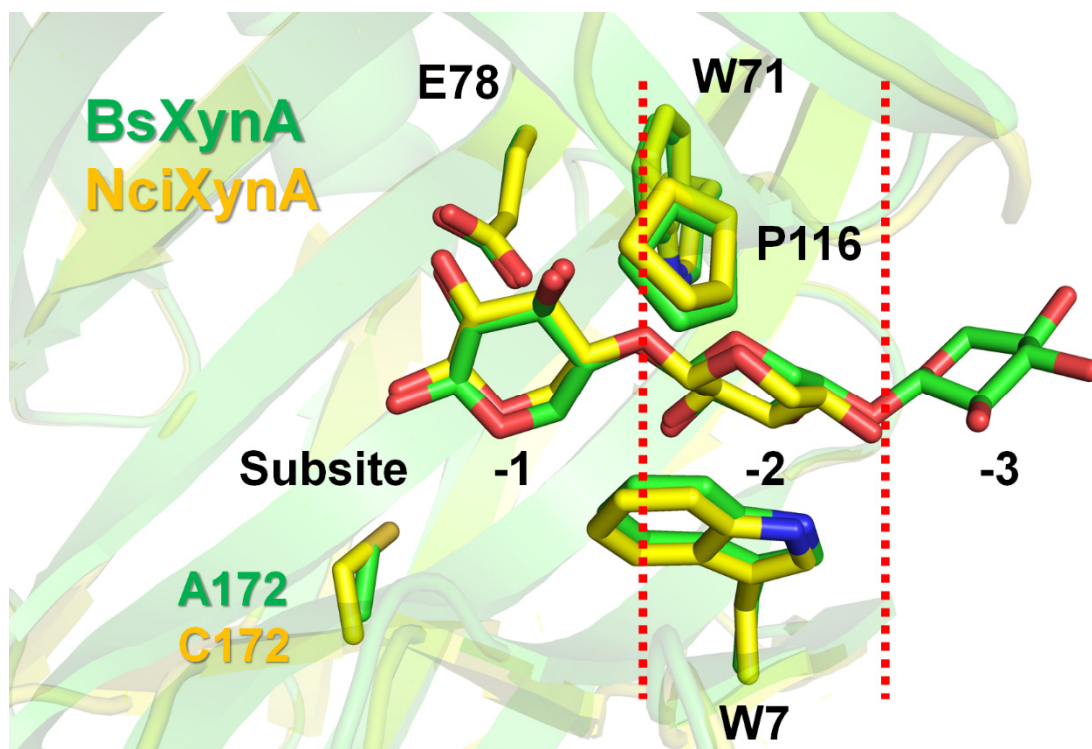

**Figure S3.** Superimposition of BsXynA-XYP3 (PDB code: 2QZ3, green) and NciXyn-XYP2 (1BCX, yellow). The position of the  $\beta$ -D-xylopyranose (XYP) molecule at the -2 subsite in BsXynA-XYP3 and NciXyn-XYP2 is almost similar.

**Table S1.** Interaction between TsaGH11 and the XYP molecule.

| XYP            | Residue<br>(atom) | Data I   |          | Data II  |            |
|----------------|-------------------|----------|----------|----------|------------|
|                |                   | Open (Å) | Open (Å) | Open (Å) | Closed (Å) |
| O1             | Tyr96 (OH)        | 3.70     | 3.21     | 3.46     | 3.31       |
|                | Glu105 (OH)       | 4.20     | 3.66     | 3.99     | 3.70       |
| O <sub>2</sub> | Tyr96 (OH)        | 3.33     | 3.05     | 3.17     | 3.02       |
|                | Qln34 (NE2)       | 3.90     | 3.53     | 3.59     | 3.68       |
|                | Tyr192 (OH)       | 3.00     | 2.84     | 2.87     | 2.92       |
| O <sub>3</sub> | Qln34 (NE2)       | 3.25     | 2.74     | 3.73     | 2.82       |
|                | Tyr192 (OH)       | 2.57     | 2.50     | 2.68     | 2.57       |
| O4             | Trp34 (NE1)       | 4.03     | 4.36     | 4.02     | 4.09       |
|                | Ser144 (O)        | 4.10     | 3.85     | 4.04     | 3.86       |
| O5             | Pro143 (O)        | 4.40     | 3.63     | 4.37     | 3.80       |
| C5             | Pro143 (CB)       | 5.01     | 4.07     | 4.92     | 4.04       |
